# Supplementary material for: Dielectric, pyroelectric, and ferroelectric studies in (1 − x)AgNbO3–xFeNbO4 lead-free ceramics
Source: Royal Society of Chemistry journal article supplement (doi:10.1039/d3dt02864j), 2023-01-01
Supplement: d3dt02864j1.pdf [file d3dt02864j1.pdf]

## Supplemental Materials

### Dielectric, Pyroelectric, and Ferroelectric Studies in $(1-x)\text{AgNbO}_3-x\text{FeNbO}_4$ Lead-free Ceramics

Parastoo Moradi<sup>a</sup>, Ehsan Taheri-Nassaj<sup>a, \*</sup>, Amin Yourdkhani<sup>a</sup>, Vasyl Mykhailovych<sup>b,c,d</sup>, Andrei Diaconu<sup>b</sup>, Aurelian Rotaru<sup>b</sup>

<sup>a</sup> Department of Materials Engineering, Tarbiat Modares University, Tehran, 14115-143, Iran

<sup>b</sup> Faculty of Electrical Engineering and Computer Science & MANSiD Research Center, Stefan cel Mare University, 13 Universitatii St., 720229, Suceava, Romania

<sup>c</sup> Department of General Chemistry and Chemistry of Materials, Yuriy Fedkovych Chernivtsi National University, 2, Kotsiubynskyi St., 58002 Chernivtsi, Ukraine

<sup>d</sup> Physical, Technical and Computer Science Institute, Yuriy Fedkovych Chernivtsi National University, 2, Kotsiubynskyi St., 58002, Chernivtsi, Ukraine

Table S1. Refinement parameters for AN ceramic at 25 °C

| Sample                                       | AN                                                    |
|----------------------------------------------|-------------------------------------------------------|
| Chemical formula                             | $\text{AgNbO}_3$                                      |
| Formula weight (g/mol)                       | 248.773                                               |
| Crystal system                               | Orthorhombic                                          |
| Space group                                  | $\text{Pmc}2_1$                                       |
| Unit cell dimensions (Å)                     | a= 15.66065(38)<br>b= 5.55063(14)<br>c= 5.60524(14)   |
| Volume (Å <sup>3</sup> )                     | 487.244(19)                                           |
| Density (calculated)<br>(g/cm <sup>3</sup> ) | 6.920                                                 |
| $\text{AgNbO}_3$ (Wt. Frac)                  | 0.99805(1)                                            |
| $\text{FeNbO}_4$ (Wt. Frac)                  | 0                                                     |
| Ag (Wt. Frac)                                | 0.00195(9)                                            |
| Chi <sup>2</sup>                             | 2.110                                                 |
| Fitted R- factors                            | $R_{\text{wp}}$ (%) 16.03<br>$R_{\text{p}}$ (%) 11.57 |

Table S2. Refinement parameters for ANF005 ceramic at 25 °C

|                                              |                                                     |       |
|----------------------------------------------|-----------------------------------------------------|-------|
| Sample                                       | ANF005                                              |       |
| Chemical formula                             | AgNbO <sub>3</sub>                                  |       |
| Formula weight (g/mol)                       | 248.773                                             |       |
| Crystal system                               | Orthorhombic                                        |       |
| Space group                                  | Pmc2 <sub>1</sub>                                   |       |
| Unit cell dimensions (Å)                     | a= 15.64172(68)<br>b= 5.54700(25)<br>c= 5.60189(26) |       |
| Volume (Å <sup>3</sup> ) AN                  | 486.046(37)                                         |       |
| Density (calculated) (g/cm <sup>3</sup> ) AN | 6.755                                               |       |
| Density (calculated) (g/cm <sup>3</sup> ) FN | 5.622                                               |       |
| AgNbO <sub>3</sub> (Wt. Frac)                | 0.92239(39)                                         |       |
| FeNbO <sub>4</sub> (Wt. Frac)                | 0.07446(226)                                        |       |
| Ag (Wt. Frac)                                | 0.00315(17)                                         |       |
| Chi <sup>2</sup>                             | 4.196                                               |       |
| Fitted R- factors                            | R <sub>wp</sub> (%)                                 | 23.75 |
|                                              | R <sub>p</sub> (%)                                  | 17.28 |

Table S3. Refinement parameters for ANF01 ceramic at 25 °C

|                                              |                                                     |       |
|----------------------------------------------|-----------------------------------------------------|-------|
| Sample                                       | ANF01                                               |       |
| Chemical formula                             | AgNbO <sub>3</sub>                                  |       |
| Formula weight (g/mol)                       | 248.773                                             |       |
| Crystal system                               | Orthorhombic                                        |       |
| Space group                                  | Pmc2 <sub>1</sub>                                   |       |
| Unit cell dimensions (Å)                     | a= 15.64202(59)<br>b= 5.54572(22)<br>c= 5.60104(24) |       |
| Volume (Å <sup>3</sup> ) AN                  | 485.869(33)                                         |       |
| Density (calculated) (g/cm <sup>3</sup> ) AN | 6.973                                               |       |
| Density (calculated) (g/cm <sup>3</sup> ) FN | 5.497                                               |       |
| AgNbO <sub>3</sub> (Wt. Frac)                | 0.93596(28)                                         |       |
| FeNbO <sub>4</sub> (Wt. Frac)                | 0.06158(202)                                        |       |
| Ag (Wt. Frac)                                | 0.00246(16)                                         |       |
| Chi <sup>2</sup>                             | 3.689                                               |       |
| Fitted R- factors                            | R <sub>wp</sub> (%)                                 | 22.18 |
|                                              | R <sub>p</sub> (%)                                  | 15.52 |

Table S4. Refinement parameters for ANF025 ceramic at 25 °C

|                                              |                                                     |       |
|----------------------------------------------|-----------------------------------------------------|-------|
| Sample                                       | ANF025                                              |       |
| Chemical formula                             | AgNbO <sub>3</sub>                                  |       |
| Formula weight (g/mol)                       | 248.773                                             |       |
| Crystal system                               | Orthorhombic                                        |       |
| Space group                                  | Pmc2 <sub>1</sub>                                   |       |
| Unit cell dimensions (Å)                     | a= 15.64173(59)<br>b= 5.54641(22)<br>c= 5.60207(24) |       |
| Volume (Å <sup>3</sup> ) AN                  | 486.010(33)                                         |       |
| Density (calculated) (g/cm <sup>3</sup> ) AN | 6.844                                               |       |
| Density (calculated) (g/cm <sup>3</sup> ) FN | 5.449                                               |       |
| AgNbO <sub>3</sub> (Wt. Frac)                | 0.92628(30)                                         |       |
| FeNbO <sub>4</sub> (Wt. Frac)                | 0.06956(176)                                        |       |
| Ag (Wt. Frac)                                | 0.00417(16)                                         |       |
| Chi <sup>2</sup>                             | 3.475                                               |       |
| Fitted R- factors                            | R <sub>wp</sub> (%)                                 | 20.15 |
|                                              | R <sub>p</sub> (%)                                  | 13.54 |

Table S5. Refinement parameters for ANF05 ceramic at 25 °C

|                                              |                                                     |       |
|----------------------------------------------|-----------------------------------------------------|-------|
| Sample                                       | ANF05                                               |       |
| Chemical formula                             | AgNbO <sub>3</sub>                                  |       |
| Formula weight (g/mol)                       | 248.773                                             |       |
| Crystal system                               | Orthorhombic                                        |       |
| Space group                                  | Pmc2 <sub>1</sub>                                   |       |
| Unit cell dimensions (Å)                     | a= 15.64416(64)<br>b= 5.54718(23)<br>c= 5.60014(25) |       |
| Volume (Å <sup>3</sup> ) AN                  | 485.986(36)                                         |       |
| Density (calculated) (g/cm <sup>3</sup> ) AN | 6.848                                               |       |
| Density (calculated) (g/cm <sup>3</sup> ) FN | 5.470                                               |       |
| AgNbO <sub>3</sub> (Wt. Frac)                | 0.89411(46)                                         |       |
| FeNbO <sub>4</sub> (Wt. Frac)                | 0.09788(223)                                        |       |
| Ag (Wt. Frac)                                | 0.00800(24)                                         |       |
| Chi <sup>2</sup>                             | 3.939                                               |       |
| Fitted R- factors                            | R <sub>wp</sub> (%)                                 | 21.71 |
|                                              | R <sub>p</sub> (%)                                  | 14.03 |

Table S6. Refinement parameters for ANF1 ceramic at 25 °C

|                                              |                     |       |
|----------------------------------------------|---------------------|-------|
| Sample                                       | ANF1                |       |
| Chemical formula                             | AgNbO <sub>3</sub>  |       |
| Formula weight (g/mol)                       | 248.773             |       |
| Crystal system                               | Orthorhombic        |       |
| Space group                                  | Pmc2 <sub>1</sub>   |       |
| Unit cell dimensions (Å)                     | a= 15.62553(71)     |       |
|                                              | b= 5.54072(25)      |       |
|                                              | c= 5.59481(26)      |       |
| Volume (Å <sup>3</sup> ) AN                  | 484.380(38)         |       |
| Density (calculated) (g/cm <sup>3</sup> ) AN | 6.844               |       |
| Density (calculated) (g/cm <sup>3</sup> ) FN | 5.459               |       |
| AgNbO <sub>3</sub> (Wt. Frac)                | 0.83871(71)         |       |
| FeNbO <sub>4</sub> (Wt. Frac)                | 0.14298(244)        |       |
| Ag (Wt. Frac)                                | 0.01830(32)         |       |
| Chi <sup>2</sup>                             | 4.274               |       |
| Fitted R- factors                            | R <sub>wp</sub> (%) | 22.63 |
|                                              | R <sub>p</sub> (%)  | 15.62 |

Table S7. The relative density with standard error of ANF(x) ceramics

| x (%)      | D <sub>relative</sub> (%) |
|------------|---------------------------|
| <b>0</b>   | 97.96 ± 0.01              |
| <b>0.5</b> | 97.37 ± 0.02              |
| <b>1</b>   | 97.16 ± 0.03              |
| <b>2.5</b> | 96.36 ± 0.02              |
| <b>5</b>   | 96.86 ± 0.03              |
| <b>10</b>  | 96.75 ± 0.03              |

Table S8. The temperature of the phase transitions of ANF(x) ceramics is based on the real parts of the dielectric permittivity-temperature spectrum during heating at 10 kHz

| x (%)      | T <sub>M1-M2</sub> (°C) | T <sub>M2-M3</sub> (°C) | T <sub>M3-o</sub> (°C) | T <sub>f</sub> (°C) |
|------------|-------------------------|-------------------------|------------------------|---------------------|
| <b>0</b>   | 71.807                  | 262.74                  | 324.5                  | 184.6               |
| <b>0.5</b> | 100.45                  | 307.11                  | 350.85                 | 192.98              |
| <b>1</b>   | 102.84                  | 306.13                  | 349.14                 | 193.63              |
| <b>2.5</b> | 78.178                  | 287.15                  | 325.92                 | 191.02              |
| <b>5</b>   | 107                     | 326.81                  | 342.79                 | 197.52              |
| <b>10</b>  | 101.58                  | -                       | 351.62                 | 193.29              |

The value of  $\epsilon_0$ ,  $\epsilon$ , and A for use in the Mott–Schottky equation is  $8.8541 \times 10^{-12} \text{ F.m}^{-1}$ ,  $1.602 \times 10^{-19} \text{ C}$  and  $A = 3.142 \times 10^{-6} \text{ m}^2$ , respectively. The value of permittivity and  $N_D$  is listed in Table S9.

Table S9. The value of the slope from the line fit in the Mott–Schottky plot, the permittivity and the calculated  $N_D$ .

| x (%)      | Slope ( $\text{F}^{-2}\text{V}^{-1}$ ) | $\epsilon$ | $N_D (\times 10^{20} \text{ m}^{-3})$ |
|------------|----------------------------------------|------------|---------------------------------------|
| <b>0</b>   | $2.75 \times 10^{18}$                  | 256.803    | 2.02                                  |
| <b>0.5</b> | $1.31 \times 10^{18}$                  | 389.198    | 2.80                                  |
| <b>1</b>   | $6.64 \times 10^{17}$                  | 399.094    | 5.39                                  |
| <b>2.5</b> | $5.91 \times 10^{17}$                  | 399.248    | 6.06                                  |
| <b>5</b>   | $4.82 \times 10^{15}$                  | 526.01     | 563.48                                |

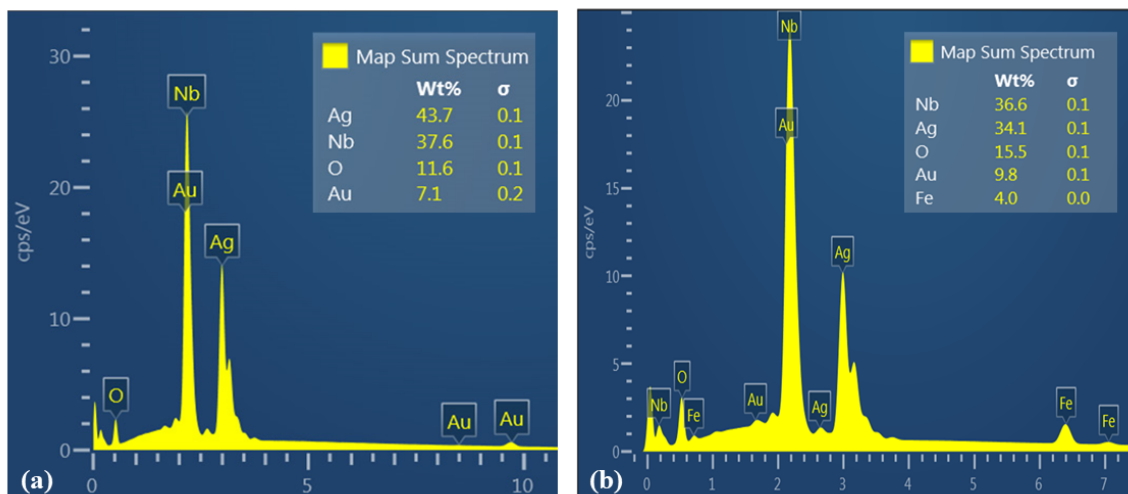

**Fig. S1.** The EDS spectral analysis of (a) AN and (b) ANF1 ceramics.

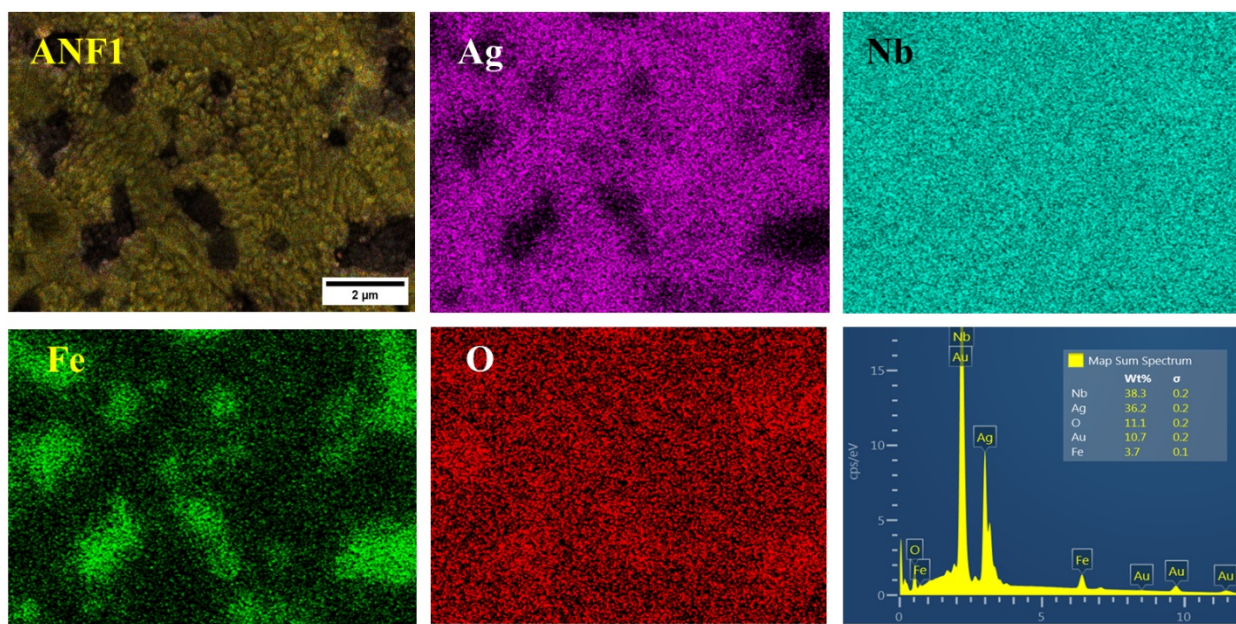

**Fig. S2.** The EDS maps and spectral analysis of the cross-sectional of ANF1 ceramic.

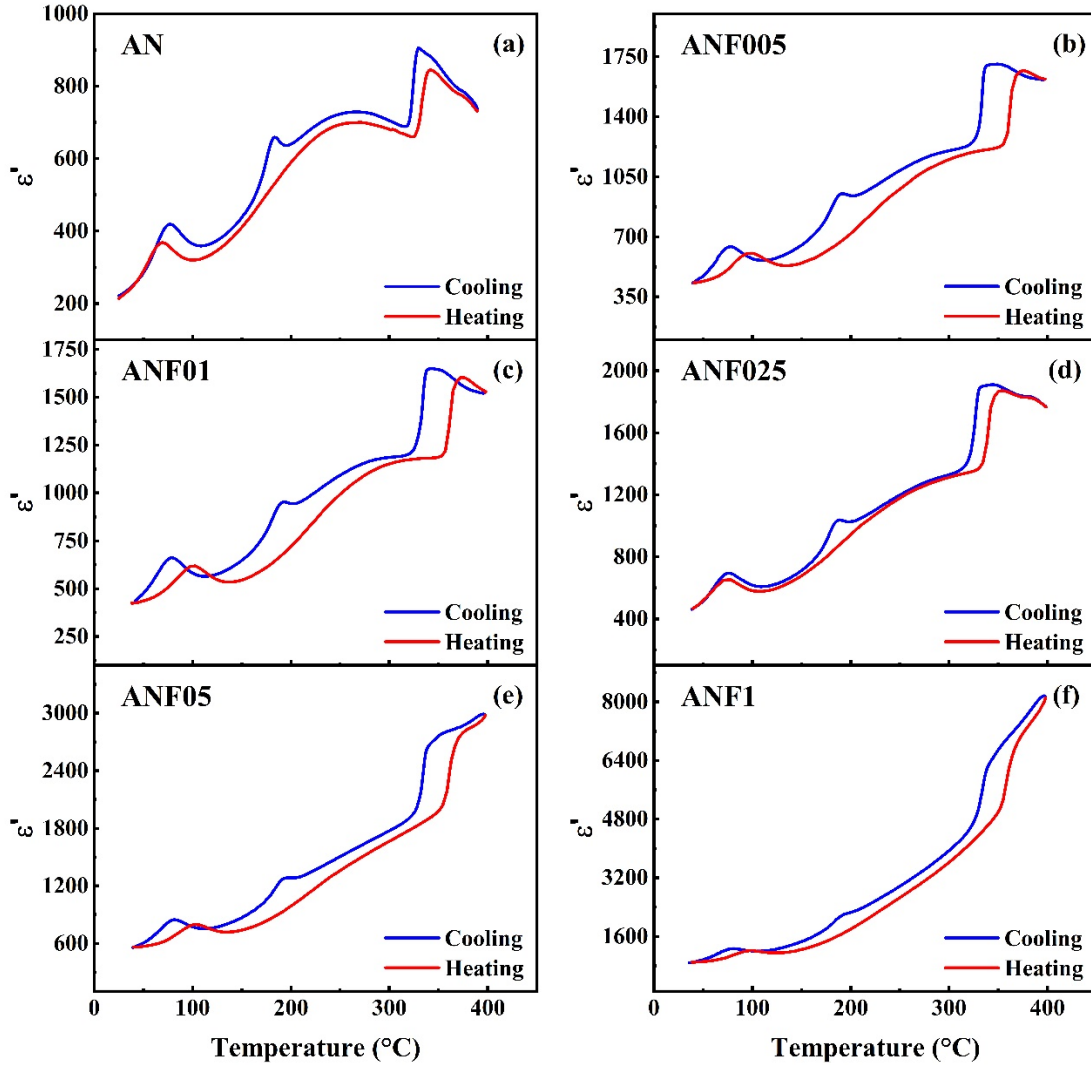

**Fig. S3.** Temperature dependence of the real ( $\epsilon'$ ) part of the dielectric permittivity of ANF(x) ceramics at 10 kHz in a heating and cooling cycle.

**Fig. S4** shows the Olsen cycle scheme by the black arrows for calculating the energy harvesting of the  $(1-x)\text{AgNbO}_3-x\text{FeNbO}_4$  ceramics. As shown, there are four processes in the Olsen cycle: (1) the isothermal process  $1 \rightarrow 2$  from a low electric field ( $E_L$ ) to a high electric field ( $E_H$ ) at low temperature ( $T_L$ ), (2) the process  $2 \rightarrow 3$  heating the sample from  $T_L$  to a high temperature ( $T_H$ ) at  $E_H$ , (3) the isothermal process  $3 \rightarrow 4$  involves decreasing from  $E_H$  to  $E_L$  at  $T_H$ , and (4) the process  $4 \rightarrow 1$  involves cooling the sample from  $T_H$  to  $T_L$  at  $E_L$  and completes a cycle. The area of the closed cycle  $1 \rightarrow 2 \rightarrow 3 \rightarrow 4$  corresponds to the harvested pyroelectric energy density ( $W$ ) obtained and can be calculated as follows<sup>1-4</sup>:

$$W = \oint E dP$$

Eq. 5

The  $W$  of  $(1-x)\text{AgNbO}_3-x\text{FeNbO}_4$  ceramics was measured between  $T_L$  (30 °C) and  $T_H$  (100 °C), and electrical fields of 15-20 kV/cm<sup>2</sup>.

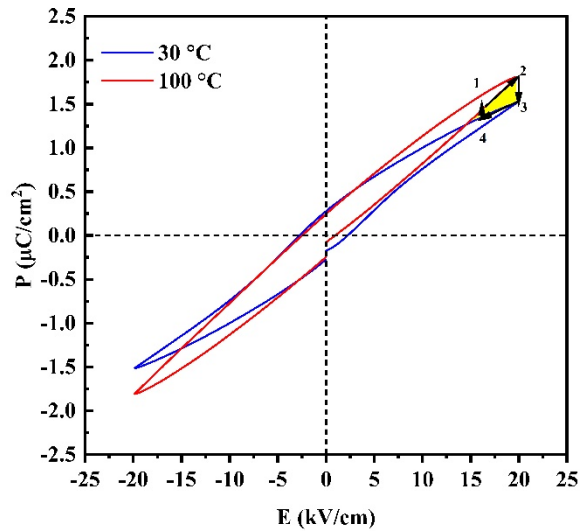

**Fig. S4.** Olsen cycle diagram of the pyroelectric energy harvesting for the  $(1-x)\text{AgNbO}_3-x\text{FeNbO}_4$  ceramics.

1. S. Li, H. Nie, G. Wang, N. Liu, M. Zhou, F. Cao and X. Dong, *Journal of Materials Chemistry C*, 2019, **7**, 4403-4414.
2. R. A. Kishore and S. Priya, *Materials*, 2018, **11**, 1433.
3. A. K. Batra and M. D. Aggarwal, 2013.
4. H. Maiwa, in *Nanoscale Ferroelectric-Multiferroic Materials for Energy Harvesting Applications*, eds. H. Kimura, Z. Cheng and T. Jia, Elsevier, 2019, DOI: <https://doi.org/10.1016/B978-0-12-814499-2.00012-8>, pp. 217-229.
